## Personalizing the Definition of Hypotension to Protect the Brain: Erratum

In the January 2020 issue, the Clinical Focus Review article “Personalizing the Definition of Hypotension to Protect the Brain” (Brady KM, Hudson A, Hood R, DeCaria B, Lewis C, Hogue CW. *ANESTHESIOLOGY* 2020; 132:170–9. doi: 10.1097/ALN.0000000000003005) contains an error in the next to last paragraph. The authors erroneously stated that 1.35 mmHg should be subtracted from blood pressure measured at the heart level for each 1 cm of head elevation such as with “beach chair” patient positioning. The aim of that subtraction is to obtain an estimate of the blood pressure at the Circle of Willis as widely discussed. This sentence should read 1 mmHg should be subtracted from the blood pressure measured at heart level for each 1.35 cm of head elevation. The corrected sentence reads: “Our findings are further consistent with the conclusion in a recent review by Drummond,<sup>47</sup> who emphasized the need to consider the projected blood pressure at the circle of Willis when the head is elevated above the horizontal as for surgery in the beach chair position (*i.e.*, subtract 1 mmHg per 1.35 cm of head elevation from blood pressure measured from arm or leg).”

The authors regret the error. The online version and PDF of the article have been corrected.

DOI: 10.1097/ALN.0000000000003364

## Reference

Brady KM, Hudson A, Hood R, DeCaria B, Lewis C, Hogue CW. Personalizing the definition of hypotension to protect the brain. *ANESTHESIOLOGY* 2020; 132:170–9. doi: 10.1097/ALN.0000000000003005.
